# Supplementary material for: Fabrication of continuous highly ordered mesoporous silica nanofibre with core/sheath structure and its application as catalyst carrier
Source: Royal Society of Chemistry journal article supplement (doi:10.1039/c1nr10547g), 2011-01-01
Supplement: c1nr10547g.pdf [file c1nr10547g.pdf]

## Supporting Information

### Fabrication of Continuous Highly-ordered Mesoporous Silica

#### Nanofibre with Core/Sheath Structure and Its Application as Catalyst

##### Carrier

Haiyan Wang<sup>a,b</sup>, Dayong Wu<sup>a\*</sup>, Dongzhou Li<sup>a</sup>, Zhongwei Niu<sup>a</sup>, Yuzhe Chen<sup>a</sup>, Daihua Tang<sup>a</sup>, Min Wu<sup>a</sup>, Jianhua Cao<sup>a</sup>, and Yong Huang<sup>a</sup>

<sup>a</sup>. Technical Institute of Physics and Chemistry, Chinese Academy of Sciences, 100190 Beijing, China.

<sup>b</sup>. Graduate University of the Chinese Academy of Sciences, 100049 Beijing, China.

##### Experimental

##### Preparation of the mesoporous silica nanofibre via coaxial electrospinning.

Mesoporous silica nanofibres with core/sheath structure were prepared by applying the coaxial electrospinning device. Tetraethoxysilican (TEOS) (Aldrich) and Pluronic F-127 (sigma) were used as silica source and structure-directing agent respectively. The preparation was completed as follows: 0.5 g of Pluronic F-127 was dissolved in 1.0 g of ethanol followed by adding 0.26 g of 0.6 M nitric acid into the mixture, then 1.5 g of TEOS was added to the mixture with stirring, resulting in a clear solution. Keeping the solution stirred for 2 h at room temperature formed a sol, which was subsequently injected to the inner capillary of the mentioned coaxial electrospinning device. Driven by a syringe pump, another solution consisting of 0.63 g of PVP (Aldrich, Mw  $\approx$  1,300,000) and 10 mL of ethanol was injected to the outer capillary. These two liquids were fed at rates of 0.3 mL/h, 1.0mL/h respectively. The spinneret that was made of

stainless steel, the inner capillary and the outer capillary were connected to a DC high-voltage supply. Usually, the output voltage was tuned in the range of 6.4 kV~8.5 kV to form steady electrospinning jets of starting materials. In the course of electrospinning, a piece of aluminum foil was well-grounded and placed 10 cm below the tip of the spinneret to collect the outcome nanofibres. After 10 min, the as-electrospun fibres were collected and then kept at 60 °C for 12 h to have the residual TEOS hydrolysis completely. Subsequently, the result nanofibre membrane was aged at 100 °C for 1 h to perfect liquid crystalline structure formed by the structure-directing agent. This proper aging process was essential to stabilize and to control the mesoporous structures before removal of the structure-directing agent. Thereafter, the nanofibre membrane was calcined at 550 °C for 6 h to remove the structure-directing agent and PVP completely. Then the high-quality ordered mesoporous silica nanofibre was obtained.

**Preparation of mesoporous  $\text{H}_2\text{N}(\text{CH}_2)_3\text{-SiO}_2$  nanofibre.** 25.3 mg of mesoporous silica nanofibre was added into 5 mL of (3-Aminopropyl) trimethoxysilane (APTMS) solution (0.1 mol/L in acetonitrile) and functionalized with  $-\text{CH}_2\text{CH}_2\text{CH}_2\text{NH}_2$  groups.<sup>[1]</sup> Followed by a centrifuging treatment to collect the solid product, the suspension was stirred for 12 hours at room temperature. After washed for several times and dried in *vacuum*, the mesoporous  $\text{H}_2\text{N}(\text{CH}_2)_3\text{-SiO}_2$  nanofibre was obtained.

**Preparation of catalysts (photosensitizers).** The homogeneous catalysts **X1** was prepared according to the literature,<sup>[2]</sup> the highly-ordered mesoporous—nanofibre-supported catalyst **X2** were prepared as follows: Dispersing 15 mg of

$\text{H}_2\text{N}(\text{CH}_2)_3\text{-SiO}_2$  nanofibre (or highly ordered mesoporous nanofibre) into 5 mL of  $\text{Pt}(\text{L})\text{Cl}$  solution ( $7.0 \times 10^{-5}$  mol/L in acetonitrile) and keeping the mixture stirred at room temperature for 3 hours, After separating by filtration and washing for ten times with acetonitrile, the pure supported catalyst was prepared. The loading amount of Pt (L) onto the mesoporous nanofibre was 5.6 mg/g obtained by calculating the decrease in UV-Vis absorption of  $\text{Pt}(\text{L})\text{Cl}/\text{CH}_3\text{CN}$  at 440 nm (**Figure S2**).

**Photosensitized oxidation.** The sensitizers, 50  $\mu\text{L}$  acetonitrile solution of **X1** ( $1.2 \times 10^{-3}$  mol/L), and 5.8 mg of **X2** were respectively added to 5 mL of trans-stilbene solution ( $1.2 \times 10^{-3}$  mol/L in acetonitrile, [cat]:[sub]=1:100), while 2  $\mu\text{L}$  of n-tetradecane was also added as the internal standard for the following gas chromatography (GC). After bubbling with pure oxygen for 10 min, the suspension was irradiated by a 500 W high-voltage mercury lamp (applying a quartz jacket with water circulation to cool the lamp, a light filter to cut off light below 400 nm, and keeping oxygen bubbled in). In this study, the irradiation lasted for 1 hour and the reaction mixture was centrifuged under 15000 rpm for 3 min to separate the upper liquid for further GC examination. The GC results indicated that the conversion ratios of this reaction sensitized by the homogeneous catalyst **X1** and heterogeneous catalysts **X2** were 49.0%, and 80.3% respectively.

**Recycling and Reuse of the supported catalyst X2.** After the first run of photosensitized oxidation, the supported catalyst **X2** was separated from the reaction solution by filtration. Followed by washing with acetonitrile for 5 times, **X2** was reused

for the next run of photosensitized oxidation. The recycling and reuse of **X2** were repeated for 9 times.

### Characterization

The prepared nanofibres were characterized by scanning electron microscopy (SEM), transmission electron microscopy (TEM), X-ray diffraction (XRD) and N<sub>2</sub> adsorption-desorption measurements. Transmission electron microscopy was conducted on a JEOL JEM-2100F microscope operating at an acceleration voltage of 120 kV. The scanning electron microscopy images were captured using a HITACHI S-4300 scanning electron microscopy operating at an acceleration voltage of 10kV. FT-IR spectra were recorded on a Varian 3100 spectrometer. XRD tests were carried out on Rigaku D/max-2000 wide angle goniometer (Cu-K $\alpha$  radiation,  $\lambda = 0.15418$  nm). Surface areas were determined by analyzing the N<sub>2</sub> adsorption isotherm according to the BET method using QUADRASORB SI. Gas chromatography (GC) was recorded on Techcomp GC7890F.

The FT-IR spectra of the prepared mesoporous silica nanofibres (MSNF) (**a**), APTMS functionalized mesoporous silica nanofibres (**b**) and the Pt(II) complex anchored sample (**c**) were shown in **Figure S1**. The peaks at 1085 cm<sup>-1</sup>, 810 cm<sup>-1</sup> and 461 cm<sup>-1</sup> were assigned to the symmetric stretching of Si-O-Si, asymmetric stretching of Si-O-Si, and bending of Si-O respectively. The peak at 960 cm<sup>-1</sup> was assigned to symmetric stretching of Si-OH. The peak at 960 cm<sup>-1</sup> decreased when MSNF was treated with APTMS (**a**) and Pt(II)L complex consequently to form **b** and **c** indicating Si-OH was reacted with APTMS, while peaks appeared at 1564 cm<sup>-1</sup> and 700 cm<sup>-1</sup> indicating the

existence of  $\text{-NH}_2$  group ( $\text{NH}_2 \delta$ ). The loading ratio of the Pt(II)L complex was relatively low, and the corresponding signals were hardly observed.

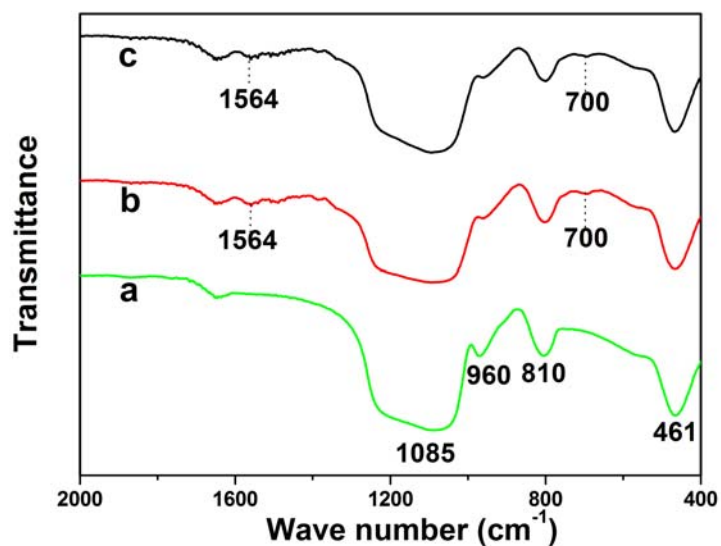

**Figure S1.** FTIR spectra of the mesostructured silica nanofibres (a), APTMS functionalized the mesostructured silica nanofibres (b) and Pt(II) complex anchored sample (c).

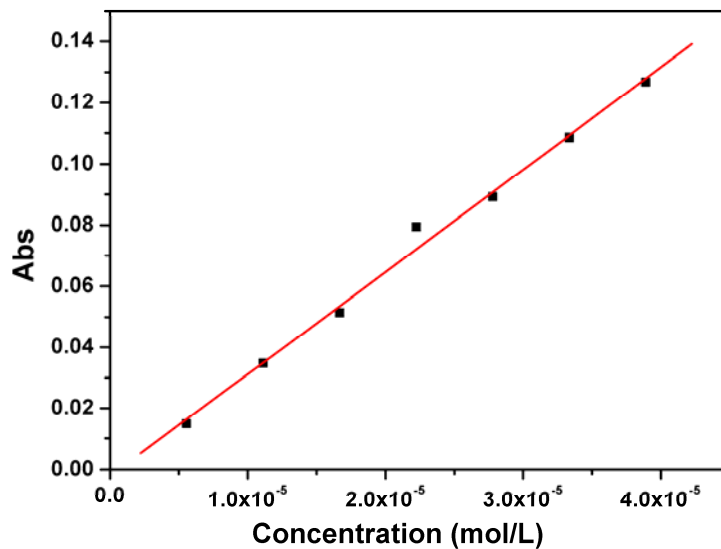

**Figure S2.** The UV-Vis absorption at 440 nm of the Pt(L)Cl complex in CH<sub>3</sub>CN as a function of its concentration. The relative coefficient is 0.998.

- [1] C. J. Liu, S. G. Li, W. Q. Pang, C. M. Che, *Chem Commun* **1997**, 65-66.
- [2] S. W. Lai, M. C. W. Chan, T. C. Cheung, S. M. Peng, C. M. Che, *Inorg. Chem.* **1999**, *38*, 4046-4055.
